# Supplementary material for: Effect of Flooding and the nosZ Gene in Bradyrhizobia on Bradyrhizobial Community Structure in the Soil
Source: PubMed Central journal article supplement (PMC5478539; doi:10.1264/jsme2.me16132), 2017-06-08
Supplement: 32_154_s1.pdf [file 32_154_s1.pdf]

# Denaturing gradient gel electrophoresis

Denaturing gradient: 41–44%  
Electrophoresis: 60°C, 100V, 14h

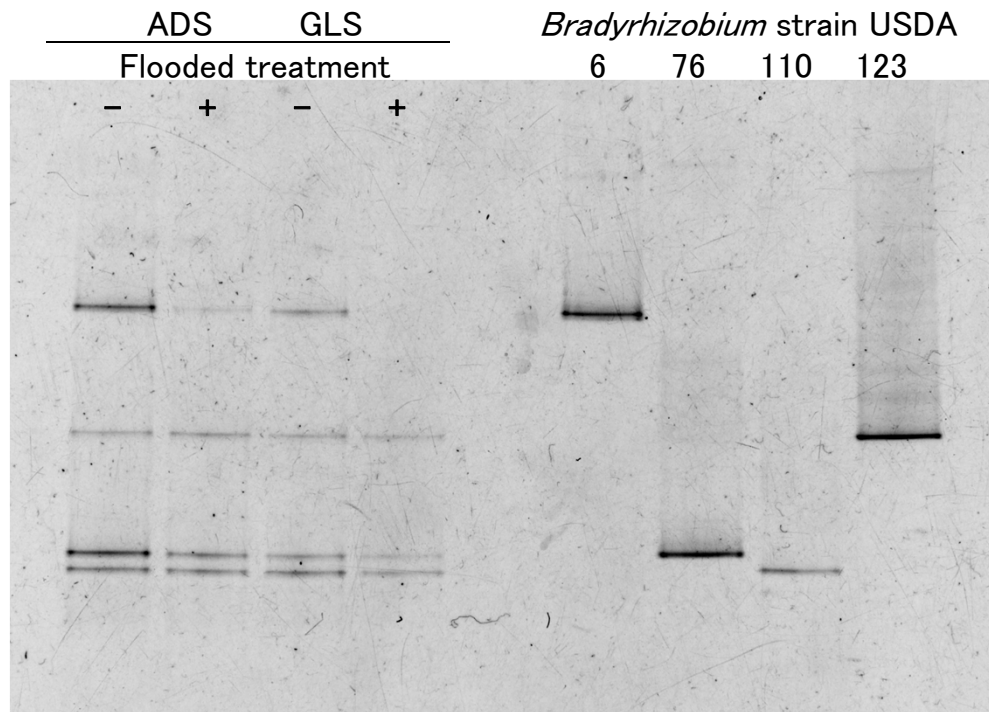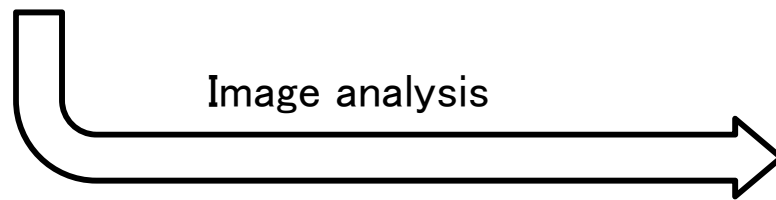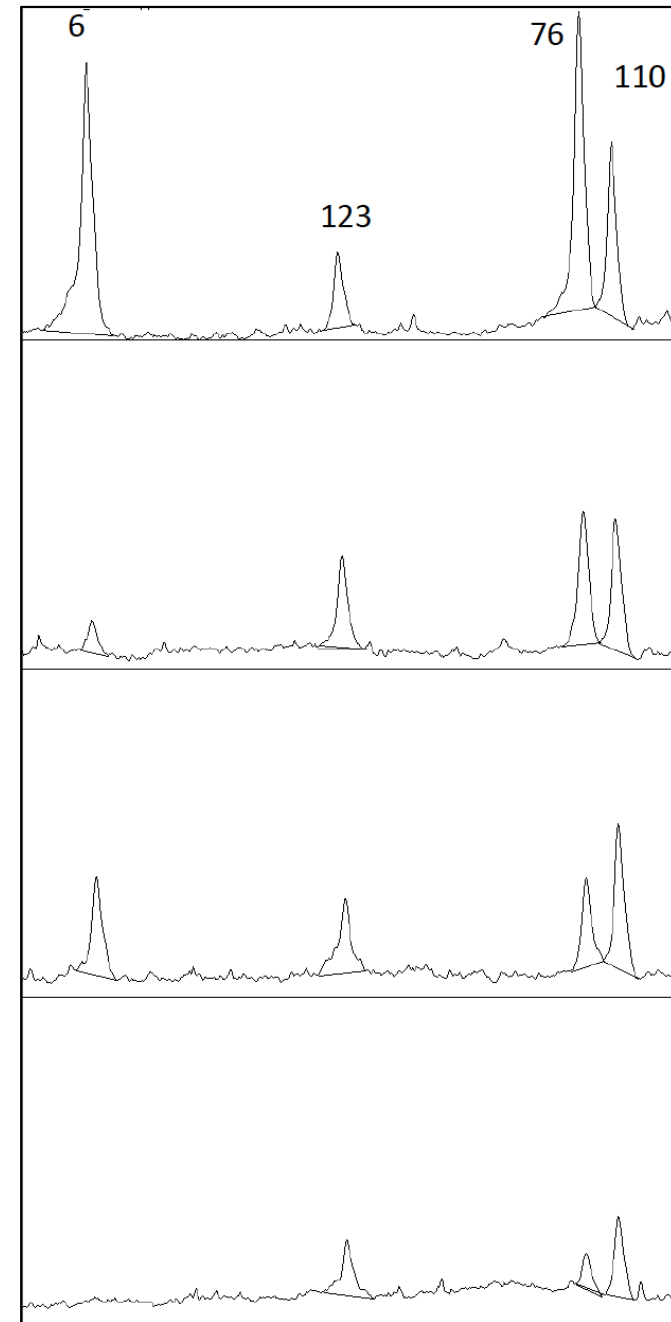

Measurement of peak area

Fig. S1. Schematic representation of a DGGE analysis and the image analysis procedure for the estimation of community structures.

Table S1 pH, EC values, and population densities of bradyrhizobia in soil microcosms.

|       | pH(H <sub>2</sub> O) 1:5 extract* |                |                | EC (dS m <sup>-1</sup> ) 1:5 extract* |                |               | Population density (CFU g <sup>-1</sup> dry soil) |                                 |                                 |
|-------|-----------------------------------|----------------|----------------|---------------------------------------|----------------|---------------|---------------------------------------------------|---------------------------------|---------------------------------|
|       | 0 day                             | 30 day         | 60 day         | 0 day                                 | 30 day         | 60 day        | 0 day                                             | 30 day                          | 60 day                          |
| ANW_H | 5.93 ± 0.02 a                     | 6.09 ± 0.05 ab | 6.05 ± 0.00 b  | 0.38 ± 0.00 a                         | 0.28 ± 0.02 b  | 0.33 ± 0.01 b | (1.26 ± 0.45) × 10 <sup>6</sup>                   | (3.17 ± 0.28) × 10 <sup>7</sup> | (3.64 ± 1.30) × 10 <sup>7</sup> |
| ANW_M |                                   | 6.06 ± 0.01 b  | 6.05 ± 0.02 b  |                                       | 0.31 ± 0.01 b  | 0.35 ± 0.01 a |                                                   | (3.09 ± 1.25) × 10 <sup>7</sup> | (3.81 ± 2.09) × 10 <sup>7</sup> |
| ANW_L |                                   | 6.11 ± 0.07 ab | 6.05 ± 0.00 b  |                                       | 0.31 ± 0.04 a  | 0.34 ± 0.02 a |                                                   | (3.17 ± 1.56) × 10 <sup>7</sup> | (8.38 ± 1.22) × 10 <sup>6</sup> |
| AFW_H | 5.93 ± 0.02 a                     | 6.80 ± 0.13 b  | 6.78 ± 0.05 b  | 0.38 ± 0.00 a                         | 0.21 ± 0.05 ab | 0.19 ± 0.00 b | (1.26 ± 0.45) × 10 <sup>6</sup>                   | (1.04 ± 0.56) × 10 <sup>8</sup> | (1.09 ± 0.39) × 10 <sup>7</sup> |
| AFW_M |                                   | 6.65 ± 0.02 b  | 6.74 ± 0.08 b  |                                       | 0.18 ± 0.00 b  | 0.18 ± 0.00 b |                                                   | (1.27 ± 0.30) × 10 <sup>8</sup> | (3.85 ± 0.80) × 10 <sup>7</sup> |
| AFW_L |                                   | 6.81 ± 0.18 b  | 6.63 ± 0.02 b  |                                       | 0.17 ± 0.01 b  | 0.16 ± 0.01 b |                                                   | (9.83 ± 1.84) × 10 <sup>7</sup> | (1.18 ± 1.62) × 10 <sup>7</sup> |
| AND_H | 6.49 ± 0.02 a                     | 6.21 ± 0.19 ab | 6.33 ± 0.04 b  | 0.41 ± 0.02 a                         | 0.37 ± 0.01 b  | 0.32 ± 0.02 b | (8.82 ± 3.29) × 10 <sup>5</sup>                   | (1.04 ± 0.33) × 10 <sup>8</sup> | (4.72 ± 1.09) × 10 <sup>7</sup> |
| AND_M |                                   | 6.13 ± 0.04 b  | 6.19 ± 0.03 b  |                                       | 0.40 ± 0.01 a  | 0.31 ± 0.03 a |                                                   | (1.04 ± 0.11) × 10 <sup>8</sup> | (5.48 ± 0.76) × 10 <sup>7</sup> |
| AND_L |                                   | 6.18 ± 0.05 b  | 6.17 ± 0.01 b  |                                       | 0.42 ± 0.07 ab | 0.31 ± 0.01 b |                                                   | (1.27 ± 0.75) × 10 <sup>8</sup> | (8.20 ± 1.16) × 10 <sup>7</sup> |
| AFD_H | 6.49 ± 0.02 a                     | 6.92 ± 0.05 b  | 6.98 ± 0.04 b  | 0.41 ± 0.02 a                         | 0.25 ± 0.01 b  | 0.23 ± 0.01 b | (8.82 ± 3.29) × 10 <sup>5</sup>                   | (2.76 ± 0.95) × 10 <sup>8</sup> | (7.77 ± 4.44) × 10 <sup>7</sup> |
| AFD_M |                                   | 6.94 ± 0.03 b  | 6.92 ± 0.16 a  |                                       | 0.25 ± 0.01 b  | 0.22 ± 0.01 b |                                                   | (1.37 ± 0.25) × 10 <sup>8</sup> | (8.76 ± 1.68) × 10 <sup>7</sup> |
| AFD_L |                                   | 6.95 ± 0.04 b  | 7.20 ± 0.05 c  |                                       | 0.24 ± 0.01 b  | 0.26 ± 0.01 b |                                                   | (1.14 ± 0.27) × 10 <sup>8</sup> | (1.01 ± 0.82) × 10 <sup>8</sup> |
| GNW_H | 6.09 ± 0.02 a                     | 5.88 ± 0.03 b  | 5.95 ± 0.02 c  | 0.28 ± 0.01 a                         | 0.32 ± 0.04 a  | 0.33 ± 0.03 a | (1.33 ± 1.00) × 10 <sup>6</sup>                   | (3.81 ± 1.28) × 10 <sup>7</sup> | (4.78 ± 1.76) × 10 <sup>7</sup> |
| GNW_M |                                   | 6.00 ± 0.07 a  | 5.89 ± 0.12 a  |                                       | 0.33 ± 0.01 a  | 0.28 ± 0.04 a |                                                   | (6.76 ± 2.36) × 10 <sup>7</sup> | (3.26 ± 1.44) × 10 <sup>7</sup> |
| GNW_L |                                   | 5.99 ± 0.02 b  | 5.96 ± 0.03 b  |                                       | 0.26 ± 0.03 a  | 0.31 ± 0.08 a |                                                   | (5.59 ± 0.43) × 10 <sup>7</sup> | (3.25 ± 1.65) × 10 <sup>7</sup> |
| GFW_H | 6.09 ± 0.02 a                     | 6.51 ± 0.21 ab | 6.42 ± 0.06 b  | 0.28 ± 0.01 a                         | 0.13 ± 0.01 b  | 0.16 ± 0.03 b | (1.33 ± 1.00) × 10 <sup>6</sup>                   | (1.43 ± 0.25) × 10 <sup>8</sup> | (1.06 ± 1.21) × 10 <sup>8</sup> |
| GFW_M |                                   | 6.68 ± 0.10 b  | 6.20 ± 0.08 a  |                                       | 0.14 ± 0.02 b  | 0.12 ± 0.00 b |                                                   | (9.24 ± 1.74) × 10 <sup>7</sup> | (9.81 ± 5.87) × 10 <sup>7</sup> |
| GFW_L |                                   | 6.53 ± 0.11 ab | 6.28 ± 0.05 b  |                                       | 0.12 ± 0.01 b  | 0.12 ± 0.08 b |                                                   | (1.64 ± 0.51) × 10 <sup>8</sup> | (1.83 ± 1.41) × 10 <sup>7</sup> |
| GND_H | 6.09 ± 0.02 a                     | 6.01 ± 0.07 a  | 5.99 ± 0.06 a  | 0.28 ± 0.01 a                         | 0.35 ± 0.04 a  | 0.34 ± 0.05 a | (1.13 ± 0.95) × 10 <sup>6</sup>                   | (4.81 ± 1.78) × 10 <sup>7</sup> | (3.65 ± 0.78) × 10 <sup>7</sup> |
| GND_M |                                   | 5.96 ± 0.09 a  | 6.01 ± 0.03 a  |                                       | 0.34 ± 0.02 a  | 0.33 ± 0.03 a |                                                   | (6.26 ± 3.66) × 10 <sup>7</sup> | (3.61 ± 0.55) × 10 <sup>7</sup> |
| GND_L |                                   | 5.85 ± 0.02 b  | 6.10 ± 0.10 ab |                                       | 0.36 ± 0.05 a  | 0.28 ± 0.02 a |                                                   | (5.60 ± 0.34) × 10 <sup>7</sup> | (3.16 ± 0.74) × 10 <sup>7</sup> |
| GFD_H | 6.09 ± 0.02 a                     | 6.69 ± 0.05 c  | 6.28 ± 0.04 b  | 0.28 ± 0.01 a                         | 0.18 ± 0.01 b  | 0.16 ± 0.00 b | (1.13 ± 0.95) × 10 <sup>6</sup>                   | (1.03 ± 0.61) × 10 <sup>8</sup> | (7.22 ± 0.50) × 10 <sup>7</sup> |
| GFD_M |                                   | 6.53 ± 0.13 a  | 6.42 ± 0.21 a  |                                       | 0.17 ± 0.01 b  | 0.16 ± 0.01 b |                                                   | (8.43 ± 0.49) × 10 <sup>7</sup> | (6.73 ± 0.60) × 10 <sup>7</sup> |
| GFD_L |                                   | 6.57 ± 0.09 b  | 6.33 ± 0.10 ab |                                       | 0.16 ± 0.00 b  | 0.16 ± 0.01 b |                                                   | (1.87 ± 0.62) × 10 <sup>8</sup> | (7.50 ± 2.57) × 10 <sup>7</sup> |

Each value is the mean ± SD ( $n=3$ ). Community nomenclature is indicated as follows: A: andosol (ADS) or G: gray lowland soil (GLS), and N: non-flooded or F: flooded conditions, and W: microcosm with the USDA110<sup>T</sup> wild-type or D: microcosm with the USDA110Δ*nosZ* variant. Additionally, High: high incubation temperature (H: 30°C), Medium: medium incubation temperature (M: 25°C), Low: low incubation temperature (L: 20°C). Although these incubations were conducted using sterile soil, and sterile water was supplied where necessary, the water supply was conducted under semi-sterile conditions. These cfu values are indicated as references.

a,b,c: different characters indicate significant differences among incubation periods (0, 30, 60 d) in the treatment (Bonferroni,  $p<0.05$ ).

Table S2 Abundance (%) of bradyrhizobia in soil microcosms under different temperature and flooding conditions

|       |      | Oday           | IP <sup>1</sup> | 30day           | IP <sup>1</sup> T <sup>2</sup> F <sup>3</sup> | 60day           | IP <sup>1</sup> T <sup>2</sup> F <sup>3</sup> |       |      | Oday            | IP <sup>1</sup>  | 30day | IP <sup>1</sup> T <sup>2</sup> F <sup>3</sup> | 60day | IP <sup>1</sup> T <sup>2</sup> F <sup>3</sup> |
|-------|------|----------------|-----------------|-----------------|-----------------------------------------------|-----------------|-----------------------------------------------|-------|------|-----------------|------------------|-------|-----------------------------------------------|-------|-----------------------------------------------|
| ANW_H | U6   | 44.76 ± 9.84   |                 | 32.07 ± 1.49    | x                                             | 31.85 ± 3.61    |                                               | AND_H | U6   | 51.81 ± 15.99   | 59.06 ± 3.81     | *     | 53.61 ± 3.51                                  | *     |                                               |
|       | U76  | 27.11 ± 12.02  |                 | 42.28 ± 4.70    | *                                             | 48.02 ± 6.72    |                                               |       | U76  | 16.32 ± 7.74    | 32.14 ± 0.52     | x *   | 34.08 ± 5.08                                  | *     |                                               |
|       | U110 | 12.71 ± 7.34   |                 | 23.13 ± 2.79    | *                                             | 16.97 ± 7.31    | *                                             |       | U110 | 7.86 ± 6.05     | 1.02 ± 0.50      |       | 1.43 ± 0.97                                   |       |                                               |
|       | U123 | 15.42 ± 9.35   |                 | 2.52 ± 0.94     | x                                             | 3.16 ± 1.08     |                                               |       | U123 | 24.01 ± 3.60 a  | 7.78 ± 4.39 b    |       | 10.87 ± 3.38 b                                |       |                                               |
| ANW_M | U6   | 44.76 ± 9.84   |                 | 48.37 ± 2.52    | y *                                           | 41.09 ± 7.33    |                                               | AND_M | U6   | 51.81 ± 15.99   | 58.95 ± 3.35     |       | 56.54 ± 2.04                                  | *     |                                               |
|       | U76  | 27.11 ± 12.02  |                 | 30.29 ± 1.18    | *                                             | 37.24 ± 1.75    |                                               |       | U76  | 16.32 ± 7.74    | 23.15 ± 1.73     | y     | 29.97 ± 0.52                                  | *     |                                               |
|       | U110 | 12.71 ± 7.34   |                 | 15.08 ± 1.21    | *                                             | 17.58 ± 6.38    | *                                             |       | U110 | 7.86 ± 6.05     | 0.54 ± 0.23      | *     | 1.07 ± 0.75                                   |       |                                               |
|       | U123 | 15.42 ± 9.35   |                 | 6.25 ± 0.47     | y                                             | 4.08 ± 0.74     |                                               |       | U123 | 24.01 ± 3.60    | 17.37 ± 2.13     |       | 12.42 ± 1.60                                  |       |                                               |
| ANW_L | U6   | 44.76 ± 9.84   |                 | 37.21 ± 2.73    | xy                                            | 35.41 ± 2.44    |                                               | AND_L | U6   | 51.81 ± 15.99   | 53.74 ± 4.11     | *     | 53.34 ± 3.92                                  |       |                                               |
|       | U76  | 27.11 ± 12.02  |                 | 37.64 ± 2.37    | *                                             | 43.11 ± 3.08    | *                                             |       | U76  | 16.32 ± 7.74    | 26.04 ± 1.01     | y *   | 29.95 ± 3.99                                  |       |                                               |
|       | U110 | 12.71 ± 7.34   |                 | 16.44 ± 3.27    | *                                             | 16.49 ± 5.91    | *                                             |       | U110 | 7.86 ± 6.05     | 0.46 ± 0.19      |       | 0.96 ± 0.34                                   |       |                                               |
|       | U123 | 15.42 ± 9.35   |                 | 8.72 ± 1.71     | y *                                           | 4.98 ± 0.64     | *                                             |       | U123 | 24.01 ± 3.60    | 19.76 ± 2.99     |       | 15.76 ± 2.28                                  | *     |                                               |
| AFW_H | U6   | 44.76 ± 9.84   |                 | 16.93 ± 7.00    |                                               | 14.07 ± 12.21   |                                               | AFD_H | U6   | 51.81 ± 15.99 a | 38.18 ± 5.58 ab  | x *   | 18.60 ± 10.70 b                               | *     |                                               |
|       | U76  | 27.11 ± 12.02  |                 | 24.30 ± 3.13    | *                                             | 47.61 ± 17.66   |                                               |       | U76  | 16.32 ± 7.74 a  | 44.98 ± 4.17 b   | x *   | 63.72 ± 9.27 b                                | x *   |                                               |
|       | U110 | 12.71 ± 7.34 a |                 | 54.44 ± 6.14 b  | *                                             | 36.25 ± 6.22 b  | *                                             |       | U110 | 7.86 ± 6.05     | 11.71 ± 4.98     |       | 12.14 ± 6.19                                  |       |                                               |
|       | U123 | 15.42 ± 9.35   |                 | 4.33 ± 1.54     |                                               | 2.06 ± 0.24     |                                               |       | U123 | 24.01 ± 3.60 a  | 5.12 ± 0.94 b    |       | 5.54 ± 2.97 b                                 |       |                                               |
| AFW_M | U6   | 44.76 ± 9.84   |                 | 35.35 ± 3.05    | *                                             | 31.04 ± 0.59    |                                               | AFD_M | U6   | 51.81 ± 15.99   | 48.80 ± 5.50     | x     | 29.22 ± 8.37                                  | *     |                                               |
|       | U76  | 27.11 ± 12.02  |                 | 14.03 ± 1.32    | *                                             | 28.62 ± 7.59    |                                               |       | U76  | 16.32 ± 7.74 a  | 26.59 ± 8.72 ab  | x     | 48.56 ± 1.37 b                                | x *   |                                               |
|       | U110 | 12.71 ± 7.34 a |                 | 45.87 ± 3.58 b  | *                                             | 36.97 ± 8.87 ab | *                                             |       | U110 | 7.86 ± 6.05     | 7.64 ± 2.64      | *     | 13.02 ± 7.81                                  |       |                                               |
|       | U123 | 15.42 ± 9.35   |                 | 4.75 ± 1.61     |                                               | 3.37 ± 1.17     |                                               |       | U123 | 24.01 ± 3.60 a  | 16.98 ± 3.64 ab  |       | 9.20 ± 0.79 b                                 |       |                                               |
| AFW_L | U6   | 44.76 ± 9.84   |                 | 40.54 ± 2.71    |                                               | 40.42 ± 5.00    |                                               | AFD_L | U6   | 51.81 ± 15.99   | 70.55 ± 1.46     | y *   | 49.97 ± 7.13                                  | ns    |                                               |
|       | U76  | 27.11 ± 12.02  |                 | 16.88 ± 2.28    | *                                             | 20.34 ± 3.80    | *                                             |       | U76  | 16.32 ± 7.74    | 15.34 ± 3.01     | y *   | 33.20 ± 9.56                                  | y     |                                               |
|       | U110 | 12.71 ± 7.34 a |                 | 37.70 ± 3.57 b  | *                                             | 36.52 ± 6.16 b  | *                                             |       | U110 | 7.86 ± 6.05     | 1.17 ± 0.55      |       | 7.66 ± 3.16                                   |       |                                               |
|       | U123 | 15.42 ± 9.35   |                 | 4.88 ± 0.79     | *                                             | 2.72 ± 0.96     | *                                             |       | U123 | 24.01 ± 3.60 a  | 12.95 ± 4.16 ab  |       | 9.17 ± 1.08 b                                 | *     |                                               |
| GNW_H | U6   | 7.89 ± 5.49    |                 | 19.82 ± 13.55   |                                               | 25.18 ± 7.02    | *                                             | GND_H | U6   | 8.77 ± 5.49 a   | 36.39 ± 11.75 ab | xy    | 36.78 ± 4.65 b                                |       |                                               |
|       | U76  | 7.57 ± 0.27 a  |                 | 37.69 ± 7.17 ab |                                               | 39.08 ± 4.63 b  |                                               |       | U76  | 16.09 ± 0.27    | 32.09 ± 7.77     |       | 40.46 ± 6.89                                  |       |                                               |
|       | U110 | 57.84 ± 5.70 a |                 | 31.57 ± 9.19 ab | *                                             | 31.27 ± 5.81 b  | *                                             |       | U110 | 49.39 ± 5.70 a  | 20.82 ± 9.29 b   |       | 16.73 ± 2.99 b                                | x     |                                               |
|       | U123 | 26.70 ± 0.39 a |                 | 10.92 ± 3.32 b  | x *                                           | 4.47 ± 2.67 b   | x                                             |       | U123 | 25.74 ± 0.39 a  | 10.70 ± 4.05 ab  | x     | 6.02 ± 3.35 b                                 | x     |                                               |
| GNW_M | U6   | 7.89 ± 5.49 a  |                 | 38.17 ± 3.75 b  | *                                             | 35.41 ± 1.13 b  | *                                             | GND_M | U6   | 8.77 ± 5.49 a   | 51.08 ± 4.10 b   | x     | 29.90 ± 14.82 ab                              |       |                                               |
|       | U76  | 7.57 ± 0.27 a  |                 | 16.15 ± 2.10 a  |                                               | 23.49 ± 1.66 b  |                                               |       | U76  | 16.09 ± 0.27    | 15.42 ± 0.67     |       | 34.60 ± 7.73                                  |       |                                               |
|       | U110 | 57.84 ± 5.70 a |                 | 18.44 ± 1.98 b  | *                                             | 17.89 ± 3.13 b  | *                                             |       | U110 | 49.39 ± 5.70 a  | 1.53 ± 0.42 b    |       | 6.65 ± 6.92 b                                 | xy    |                                               |
|       | U123 | 26.70 ± 0.39   |                 | 27.24 ± 0.37    | y *                                           | 23.22 ± 1.85    | y *                                           |       | U123 | 25.74 ± 0.39    | 31.97 ± 3.60     | y     | 28.85 ± 1.24                                  | y     |                                               |
| GNW_L | U6   | 7.89 ± 5.49 a  |                 | 29.82 ± 2.66 b  |                                               | 23.37 ± 6.25 ab |                                               | GND_L | U6   | 8.77 ± 5.49 a   | 37.74 ± 2.48 b   | y     | 32.67 ± 4.25 b                                |       |                                               |
|       | U76  | 7.57 ± 0.27 a  |                 | 16.49 ± 5.64 ab |                                               | 30.89 ± 2.64 b  |                                               |       | U76  | 16.09 ± 0.27    | 19.19 ± 7.02     |       | 28.60 ± 4.28                                  |       |                                               |
|       | U110 | 57.84 ± 5.70 a |                 | 17.85 ± 3.66 b  | *                                             | 19.09 ± 3.31 b  | *                                             |       | U110 | 49.39 ± 5.70 a  | 1.30 ± 0.37 b    | *     | 1.43 ± 0.39 b                                 | y *   |                                               |
|       | U123 | 26.70 ± 0.39   |                 | 35.84 ± 9.44    | xy *                                          | 26.64 ± 0.66    | y *                                           |       | U123 | 25.74 ± 0.39    | 41.77 ± 6.27     | y     | 37.29 ± 4.59                                  | y     |                                               |
| GFW_H | U6   | 7.89 ± 5.49    |                 | 10.02 ± 1.29    | x                                             | 4.70 ± 4.00     | x *                                           | GFD_H | U6   | 8.77 ± 5.49     | 25.25 ± 3.21     |       | 16.49 ± 12.12                                 |       |                                               |
|       | U76  | 7.57 ± 0.27    |                 | 28.64 ± 9.68    |                                               | 24.78 ± 11.35   |                                               |       | U76  | 16.09 ± 0.27 a  | 40.74 ± 5.59 b   | x     | 43.34 ± 8.63 ab                               |       |                                               |
|       | U110 | 57.84 ± 5.70   |                 | 58.63 ± 9.68    | *                                             | 69.00 ± 15.60   | *                                             |       | U110 | 49.39 ± 5.70    | 31.39 ± 3.48     | x     | 33.40 ± 12.81                                 |       |                                               |
|       | U123 | 26.70 ± 0.39 a |                 | 2.71 ± 0.19 b   | x *                                           | 1.52 ± 0.27 b   | x                                             |       | U123 | 25.74 ± 0.39 a  | 2.62 ± 1.00 b    |       | 6.77 ± 5.51 ab                                |       |                                               |
| GFW_M | U6   | 7.89 ± 5.49    |                 | 15.63 ± 8.23    | xy *                                          | 14.65 ± 2.37    | xy *                                          | GFD_M | U6   | 8.77 ± 5.49     | 50.98 ± 29.27    |       | 20.48 ± 11.54                                 |       |                                               |
|       | U76  | 7.57 ± 0.27 a  |                 | 12.18 ± 0.96 b  |                                               | 23.53 ± 8.79 ab |                                               |       | U76  | 16.09 ± 0.27    | 12.89 ± 7.57     | y     | 38.36 ± 16.56                                 |       |                                               |
|       | U110 | 57.84 ± 5.70   |                 | 64.28 ± 8.36    | *                                             | 57.40 ± 10.10   | *                                             |       | U110 | 49.39 ± 5.70 a  | 13.43 ± 4.94 b   | y     | 22.66 ± 14.89 ab                              |       |                                               |
|       | U123 | 26.70 ± 0.39 a |                 | 7.92 ± 3.22 b   | xy *                                          | 4.42 ± 0.53 b   | y *                                           |       | U123 | 25.74 ± 0.39    | 22.69 ± 17.52    |       | 18.50 ± 14.14                                 |       |                                               |
| GFW_L | U6   | 7.89 ± 5.49    |                 | 26.45 ± 2.12    | y                                             | 21.81 ± 5.21    | y                                             | GFD_L | U6   | 8.77 ± 5.49     | 52.98 ± 18.61    |       | 29.25 ± 18.14                                 |       |                                               |
|       | U76  | 7.57 ± 0.27    |                 | 12.47 ± 2.95    |                                               | 26.32 ± 4.97    |                                               |       | U76  | 16.09 ± 0.27 ab | 10.78 ± 3.72 a   | y     | 24.79 ± 3.49 b                                |       |                                               |
|       | U110 | 57.84 ± 5.70   |                 | 53.57 ± 2.44    | *                                             | 45.74 ± 6.80    | *                                             |       | U110 | 49.39 ± 5.70 a  | 7.09 ± 1.91 b    | y *   | 7.55 ± 2.01 b                                 | *     |                                               |
|       | U123 | 26.70 ± 0.39 a |                 | 7.51 ± 0.67 b   | y *                                           | 6.13 ± 2.44 b   | y *                                           |       | U123 | 25.74 ± 0.39    | 29.15 ± 15.30    |       | 38.42 ± 20.81                                 |       |                                               |

Each value is the mean ± SD ( $n=3$ ). Community nomenclature is indicated as follows: A: andosol (ADS) or G: gray lowland soil (GLS), and N: non-flooded or F: flooded conditions, and W: microcosm with the USDA110<sup>T</sup> wild-type or D: microcosm with the USDA110ΔnosZ variant. Additionally, High: high incubation temperature (H: 30°C), Medium: medium incubation temperature (M: 25°C), Low: low incubation temperature (L: 20°C).

<sup>1</sup>IP(a,b): different characters indicate significant differences among incubation periods (0, 30, 60 d) in the treatment (Bonferroni,  $p<0.05$ ).

<sup>2</sup>T(x,y): different characters indicate significant differences among incubation temperatures (H, M, L) in the treatment (Bonferroni,  $p<0.05$ ).

<sup>3</sup>F(\*): asterisk indicates a significant difference between flooded and non-flooded conditions in the treatment (Welch's t-test,  $p<0.05$ ).
